# Supplementary material for: Time to COVID-19 Vaccination by Language and Country of Origin
Source: PubMed Central journal article supplement (PMC11450518; doi:10.1001/jamanetworkopen.2024.37388), 2024-10-03
Supplement: jamanetwopen-e2437388-s001.pdf [file jamanetwopen-e2437388-s001.pdf]

## Data Sharing Statement

Nolan. Time to COVID-19 Vaccination by Language and Country of Origin. *JAMA Netw Open*. Published October 03, 2024. doi:10.1001/jamanetworkopen.2024.37388

### Data

**Data available:** Yes

**Data types:** Data dictionary, Other (please specify)

**Additional Information:** Summary data from participating sites

**How to access data:** [margaret.b.nolan@healthpartners.com](mailto:margaret.b.nolan@healthpartners.com)

**When available:** With publication

### Supporting Documents

**Document types:** None

### Additional Information

**Who can access the data:** Researchers whose proposed use of the data has been approved

**Types of analyses:** Specified purpose

**Mechanisms of data availability:** Signed data access agreement
